# Supplementary material for: Transcriptome Analysis of Taxillusi chinensis (DC.) Danser Seeds in Response to Water Loss
Source: PubMed Central journal article supplement (PMC5207531; doi:10.1371/journal.pone.0169177), 2017-01-03
Supplement: pone.0169177.s001.pdf [file pone.0169177.s001.pdf]

## Supplementary file

### Assembl:

```
Trinity --seqType fq --JM 100G --CPU 8 --left fastq_files/CK_11_1.fq,fastq_files/Tac-16_11_1.fq,fastq_files/Tac-36_11_1.fq, fastq_files/CK2_1.fq.gz, fastq_files/Tac162_1.fq.gz, fastq_files/Tac362_1.fq.gz --right fastq_files/CK_11_2.fq,fastq_files/Tac-16_11_2.fq,fastq_files/Tac-36_11_2.fq, fastq_files/CK2_2.fq.gz, fastq_files/ Tac162_2.fq.gz, fastq_files/ Tac362_2.fq.gz --output taxillus_chinensis
```

### Annotation:

```
TransDecoder -t Trinity.fasta
```

```
blastx -query Trinity.fasta -db uniprot_sprot.trinotate_v2.0.pep -num_threads 8 -max_target_seqs 1 -outfmt 6 > blastx.outfmt6
```

```
blastp -query Trinity.fasta.transdecoder.pep -db uniprot_sprot.trinotate_v2.0.pep -num_threads 8 -max_target_seqs 1 -outfmt 6 > blastp.outfmt6
```

```
hmmsearch --cpu 8 --domtblout TrinotatePFAM.out Pfam-A.hmm Trinity.fasta.transdecoder.pep >pfam.log
```

```
signalp -f short -n signalp.out Trinity.fasta.transdecoder.pep
```

```
tmhmm --short < Trinity.fasta.transdecoder.pep >tmhmm.out
```

```
perl ~/Trinotate-2.0.2/util/rnammer_support/RnammerTranscriptome.pl --transcriptome Trinity.fasta --transcriptome /usr/local/rnammer/1.2/bin/rnammer
```

```
TRINITY_HOME/util/support_scripts/get_Trinity_gene_to_trans_map.pl Trinity.fasta > Trinity.fasta.gene_trans_map
```

```
Trinotate Trinotate.sqlite init --gene_trans_map Trinity.fasta.gene_trans_map --transcript_fasta Trinity.fasta --transdecoder_pep transdecoder.pep
```

```
Trinotate Trinotate.sqlite LOAD_swissprot_blastp blastp.outfmt6
```

```
Trinotate Trinotate.sqlite LOAD_swissprot_blastx blastx.outfmt6
```

```
Trinotate Trinotate.sqlite LOAD_pfam TrinotatePFAM.out
```

```
Trinotate Trinotate.sqlite LOAD_tmhmm tmhmm.out
```

```
Trinotate Trinotate.sqlite LOAD_signalp signalp.out
```

```
Trinotate Trinotate.sqlite LOAD_rnammer Trinity.fasta.rnammer.gff
```

```
Trinotate Trinotate.sqlite report -E 1e-5 --pfam_cutoff DNC|DGC|DTC|SNC|SGC|STC > trinotate_annotation_report.xls
```

### RSEM:

```
perl /usr/local/trinityrnaseq/r20140717-gcc/util/align_and_estimate_abundance.pl --transcripts taxillus_chinensis/Trinity.fasta --est_method RSEM --aln_method bowtie2 --trinity_mode --prep_reference
```

```
perl /usr/local/trinityrnaseq/r20140717-gcc/util/align_and_estimate_abundance.pl --transcripts taxillus_chinensis/Trinity.fasta --seqType fq --left fastq_files/CK_11_1.fq.gz --right
```

```
fastq_files/CK_11_2.fq.gz --est_method RSEM --aln_method bowtie2 --trinity_mode --output_dir RSEM/CK-1
```

```
perl /usr/local/trinityrnaseq/r20140717-gcc/util/align_and_estimate_abundance.pl --transcripts taxillus_chinensis/Trinity.fasta --seqType fq --left fastq_files/CK2_1.fq.gz --right fastq_files/CK2_2.fq.gz --est_method RSEM --aln_method bowtie2 --trinity_mode --output_dir RSEM/CK-2
```

```
perl /usr/local/trinityrnaseq/r20140717-gcc/util/align_and_estimate_abundance.pl --transcripts taxillus_chinensis/Trinity.fasta --seqType fq --left fastq_files/Tac-16_11_1.fq.gz --right fastq_files/Tac-16_11_2.fq.gz --est_method RSEM --aln_method bowtie2 --trinity_mode --output_dir RSEM/Tac-16-1
```

```
perl /usr/local/trinityrnaseq/r20140717-gcc/util/align_and_estimate_abundance.pl --transcripts taxillus_chinensis/Trinity.fasta --seqType fq --left fastq_files/Tac-162_1.fq.gz --right fastq_files/Tac-162_2.fq.gz --est_method RSEM --aln_method bowtie2 --trinity_mode --output_dir RSEM/Tac-16-2
```

```
perl /usr/local/trinityrnaseq/r20140717-gcc/util/align_and_estimate_abundance.pl --transcripts taxillus_chinensis/Trinity.fasta --seqType fq --left fastq_files/Tac-36_11_1.fq.gz --right fastq_files/Tac-36_11_2.fq.gz --est_method RSEM --aln_method bowtie2 --trinity_mode --output_dir RSEM/Tac-36-1
```

```
perl /usr/local/trinityrnaseq/r20140717-gcc/util/align_and_estimate_abundance.pl --transcripts taxillus_chinensis/Trinity.fasta --seqType fq --left fastq_files/Tac-362_1.fq.gz --right fastq_files/Tac-362_2.fq.gz --est_method RSEM --aln_method bowtie2 --trinity_mode --output_dir RSEM/Tac-36-2
```

### **Differential expression:**

Take Tac-16\_vs\_CK as an example:

```
library(edgeR)
```

```
x <- read.delim("taxillus_seeds_dehydration.counts.matrix",row.names=" transcript_id")
```

```
group <- factor(c(1,1,2,2))
```

```
y <- DGEList(counts=x,group=group)
```

```
keep <- rowSums(cpm(y)>1) >= 1
```

```
y <- y[keep, , keep.lib.sizes=FALSE]
```

```
y <- calcNormFactors(y)
```

```
et <- exactTest(y,0.1)
```

```
temp <- topTags(et,n=Inf)
```

```
write.table(temp,"raw_isoform_result.txt")
```
